# Supplementary material for: Unravelling the photophysics of triphenylamine and diphenylamine dyes: a comprehensive investigation with ortho-, meta- and para-amido substituted derivatives
Source: Royal Society of Chemistry journal article supplement (doi:10.1039/d0nj04569a), 2020-01-01
Supplement: d0nj04569a1.pdf [file d0nj04569a1.pdf]

## Electronic Supporting Information

### **Unravelling the Photophysics of Triphenylamine and Diphenylamine Dyes: A Comprehensive Investigation with *ortho*-, *meta*- and *para*- Amido Substituted Derivatives**

Narendra Mandare<sup>a,#</sup>, Ponnusamy Shanmugam<sup>b</sup> Mahesh Sundararajan<sup>c</sup>, and Sharmistha Dutta Choudhury<sup>a,d,\*</sup>

<sup>a</sup>*Radiation & Photochemistry Division, Bhabha Atomic Research Centre, Mumbai 400085, India.*

<sup>b</sup>*Organic and Bio-Organic Chemistry Division, CSIR-Central Leather Research Institute, Adyar, Chennai-600020, India; and Professor of Chemistry at the Academy of Scientific and Innovative Research (AcSIR), Anusandhan Bhawan, 2, Rafi Marg, New Delhi, India.*

<sup>c</sup>*Theoretical Chemistry Section, Bhabha Atomic Research Centre, Mumbai 400085, India*

<sup>d</sup>*Homi Bhabha National Institute, Training School Complex, Anushaktinagar, Mumbai 400094, India.*

<sup>#</sup>On M.Sc. project from K. J. Somaiya College of Science and Commerce, Mumbai, India.

#### **Corresponding Author:**

\*E-mail: sharmidc@barc.gov.in; Telephone: 91-22-25595101; Fax: 91-22-25505151

#### **Note S1. Synthesis and Characterization of the DPA and TPA derivatives**

The DPA and TPA series of dyes were synthesized by N-mono and N,N-diarylation of various positionally placed aminobenzamides, using benzyne, as described in a previous publication.<sup>1</sup> Briefly, 2-, 3- or 4-aminobenzamide was reacted with benzyne, which was generated *in situ* from 2.2 equivalents of 2-(trimethylsilyl) phenyl trifluoromethane sulfonate using 4 equivalents of KF and 18-crown 6, in dry acetonitrile under Ar atmosphere at RT. The typical reaction scheme yielding both mono- and di- arylated products in excellent combined yield is shown in Chart S1. The product mixture was purified by silica gel column chromatography to obtain the pure compounds (DPA-*o* and TPA-*o*, DPA-*m* and TPA-*m*, DPA-*p* and TPA-*p*), which were subsequently characterised by spectroscopic techniques.

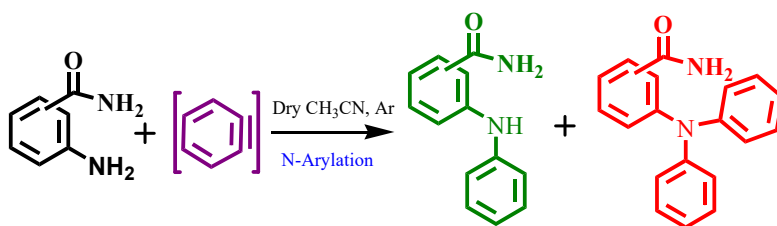

**Chart S1.** General scheme for the synthesis of *N*-mono (DPA series) and *N,N*-diarylated (TPA series) derivatives from 2-, 3- or 4-aminobenzamide.

**2-(Diphenylamino)benzamide (TPA-*o*).** Colourless crystals;  $R_f$  (30% EtOAc-hexane): 0.40; FTIR (KBr)  $\lambda_{\max}$ : 3421, 3328, 3242, 3134, 3030, 2923, 2854, 1945, 1671, 1588, 1486, 1448, 1373, 1278, 1247, 1153, 1082, 1035, 970, 919, 880, 820, 783, 752, 694, 621, 509  $\text{cm}^{-1}$ ;  $^1\text{H}$  NMR (400 MHz,  $\text{CDCl}_3$ ):  $\delta$  7.94 (dd,  $J = 7.8, 1.3$  Hz, 1H), 7.40 (td,  $J = 7.8, 1.5$  Hz, 1H), 7.25 (t,  $J = 7.6$  Hz, 2H), 7.17 (dd,  $J = 12.7, 4.3$  Hz, 4H), 7.07 (d,  $J = 7.9$  Hz, 1H), 6.93 (t,  $J = 8.9$  Hz, 6H), 5.58 (s, 1H);  $^{13}\text{C}$  NMR ( $\text{CDCl}_3/\text{TMS}$ , 100 MHz):  $\delta$  121.5, 122.4, 123.0, 126.1, 129.3, 129.4, 130.3, 131.7, 132.8, 145.1, 147.4, 168.0; HRMS-ESI: calculated for  $\text{C}_{19}\text{H}_{16}\text{N}_2\text{O}$   $[\text{M}]^+$   $m/z$ : 288.1063; found 288.0989.

**3-(Diphenylamino)benzamide (TPA-*m*).** Yellowish powder;  $R_f$  (30% EtOAc-hexane): 0.48; FTIR (KBr)  $\lambda_{\max}$ : 3521, 3429, 3343, 3235, 3132, 2943, 2854, 1845, 1691, 1488, 1448, 1353, 1298, 1237, 1143, 1052, 1035, 919, 862, 820, 762, 752, 684, 621, 506  $\text{cm}^{-1}$ ;  $^1\text{H}$  NMR (400 MHz,  $\text{CDCl}_3$ ):  $\delta$  7.43 (t,  $J = 1.9$  Hz, 1H), 7.31–7.28 (m, 1H), 7.21–7.10 (m, 6H), 7.01–6.93 (m, 6H), 6.06 (s, 2H);  $^{13}\text{C}$  NMR ( $\text{CDCl}_3/\text{TMS}$ , 100 MHz):  $\delta$  120.9, 122.0, 123.4, 124.5, 126.7, 129.4, 134.7, 147.3, 148.4, 169.5; HRMS-ESI: calculated for  $\text{C}_{19}\text{H}_{16}\text{N}_2\text{O}$   $[\text{M}]^+$   $m/z$ : 288.1063; found 289.1141.

**4-(Diphenylamino)benzamide (TPA-*p*).** Yellowish powder;  $R_f$  (30% EtOAc-hexane): 0.46; FTIR (KBr)  $\lambda_{\max}$ : 3411, 3458, 3422, 3314, 3200, 2973, 2844, 1845, 1761, 1658, 1448, 1353, 1228, 1156, 1072, 1055, 960, 919, 860, 822, 773, 752, 674, 623, 509  $\text{cm}^{-1}$ ;  $^1\text{H}$  NMR (400 MHz,  $\text{CDCl}_3$ ):  $\delta$  7.59–7.56 (m, 2H), 7.24–7.20 (m, 4H), 7.07–7.01 (m, 6H), 6.95–6.93 (m, 2H), 5.83 (s, 2H);  $^{13}\text{C}$  NMR ( $\text{CDCl}_3/\text{TMS}$ , 100 MHz):  $\delta$  120.6, 124.2, 125.3, 125.6, 128.6, 129.5, 146.8, 151.3, 168.9; HRMS-ESI: calculated for  $\text{C}_{19}\text{H}_{16}\text{N}_2\text{O}$   $[\text{M}]^+$   $m/z$ : 288.1063; found 289.1106.

**2-(Phenylamino)benzamide (DPA-*o*).** Colourless powder;  $R_f$  (30% EtOAc-hexane): 0.42; FTIR (KBr)  $\lambda_{\max}$ : 3454, 3416, 3339, 3169, 2885, 2735, 1623, 1585, 1513, 1443, 1391, 1316, 1289, 1158, 1078, 889, 743, 693, 625, 560, 500  $\text{cm}^{-1}$ ;  $^1\text{H}$  NMR (400 MHz,  $\text{CDCl}_3$ ):  $\delta$  9.43 (s, 1H), 7.39 (dd,  $J = 7.9, 1.4$  Hz, 1H), 7.28–7.17 (m, 4H), 7.15–7.12 (m, 2H), 6.98–6.93 (m, 1H), 6.67 (ddd,  $J = 8.1, 6.9, 1.4$  Hz, 1H), 5.92 (s, 2H);  $^{13}\text{C}$  NMR ( $\text{CDCl}_3/\text{TMS}$ , 100 MHz):  $\delta$  115.3, 116.0, 117.5, 121.5, 122.8, 128.3, 129.3, 132.9, 141.2, 146.9, 171.9; HRMS-ESI: calculated for  $\text{C}_{13}\text{H}_{12}\text{N}_2\text{O}$   $[\text{M} + \text{H}]^+$   $m/z$ : 213.0910, found 213.0892.

**3-(Phenylamino)benzamide (DPA-*m*).** Colourless powder;  $R_f$  (30% EtOAc-hexane): 0.43; FTIR (KBr)  $\lambda_{\max}$ : 3453, 3420, 3343, 3201, 2885, 2363, 1657, 1598, 1521, 1416, 1378, 1303, 1289, 1258, 1063, 788, 653, 615, 560  $\text{cm}^{-1}$ ;  $^1\text{H}$  NMR (400 MHz,  $\text{CDCl}_3$ ):  $\delta$  7.44–7.43 (m, 1H), 7.25–7.18 (m, 4H), 7.17–7.12 (m, 2H), 7.04–7.01 (m, 2H), 6.91 (t,  $J = 7.4$  Hz, 1H), 5.91

(s, 2H);  $^{13}\text{C}$  NMR ( $\text{CDCl}_3/\text{TMS}$ , 100 MHz):  $\delta$  114.0, 115.9, 116.1, 118.8, 118.9, 120.2, 122.0, 123.5, 124.0, 124.6, 129.5, 134.5, 139.2, 142.1, 144.0, 169.6; HRMS-ESI: calculated for  $\text{C}_{13}\text{H}_{12}\text{N}_2\text{O}$   $[\text{M} + \text{H}]^+$   $m/z$ : 213.0910, found 213.0862.

**4-(Phenylamino)benzamide (DPA-*p*)**. Colourless powder;  $R_f$  (30% EtOAc-hexane): 0.40; FTIR (KBr)  $\lambda_{\text{max}}$ : 3553, 3473, 3343, 2976, 2635, 2360, 1652, 1554, 1501, 1444, 1388, 1329, 1279, 1248, 1043, 712, 623, 625, 573  $\text{cm}^{-1}$ ;  $^1\text{H}$  NMR (400 MHz,  $\text{CDCl}_3$ ):  $\delta$  7.66–7.62 (m, 2H), 7.28–7.23 (m, 2H), 7.09 (ddd,  $J = 3.0, 2.5, 1.4$  Hz, 2H), 7.00–6.92 (m, 3H), 5.98 (s, 1H), 5.74 (s, 2H);  $^{13}\text{C}$  NMR ( $\text{CDCl}_3/\text{TMS}$ , 100 MHz):  $\delta$  115.0, 120.1, 122.9, 124.1, 129.2, 129.5, 141.0, 147.3, 168.9; HRMS-ESI: calculated for  $\text{C}_{13}\text{H}_{12}\text{N}_2\text{O}$   $[\text{M} + \text{H}]^+$   $m/z$ : 213.0910, found 213.0892.

(A)

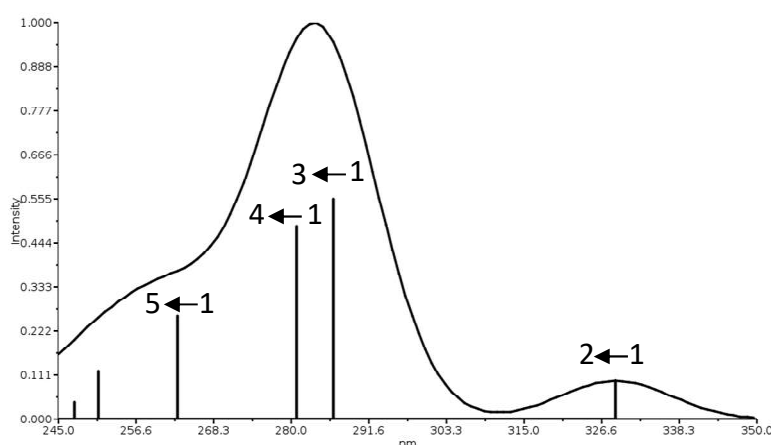

(B)

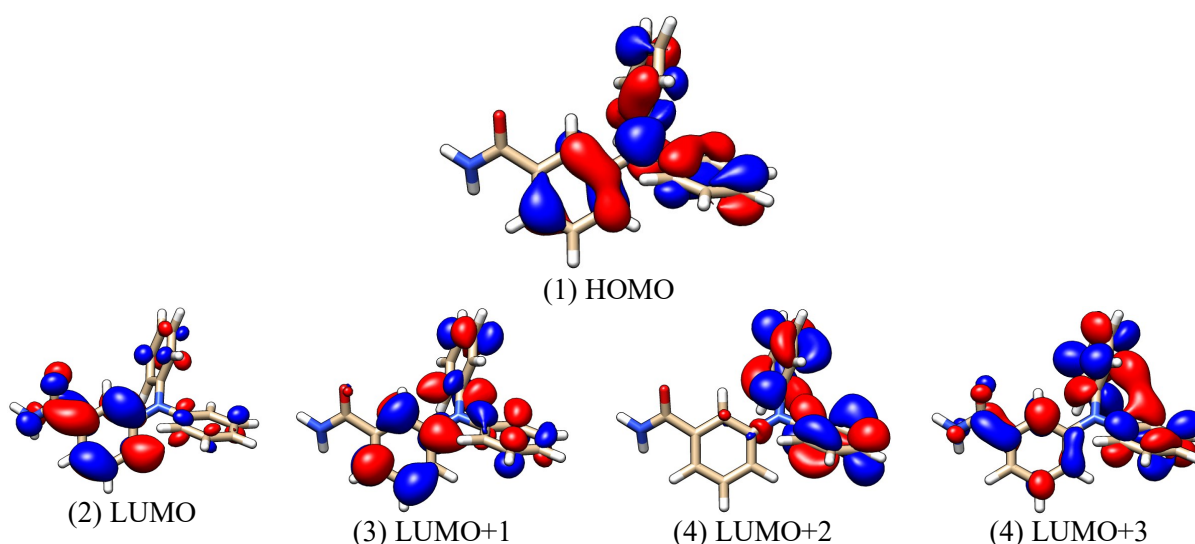

**Fig. S1.** (A) Computed absorption spectrum of TPA-*m* dye considering ACN as the solvent medium. (B) Molecular orbitals involved in the four lowest transitions are shown.

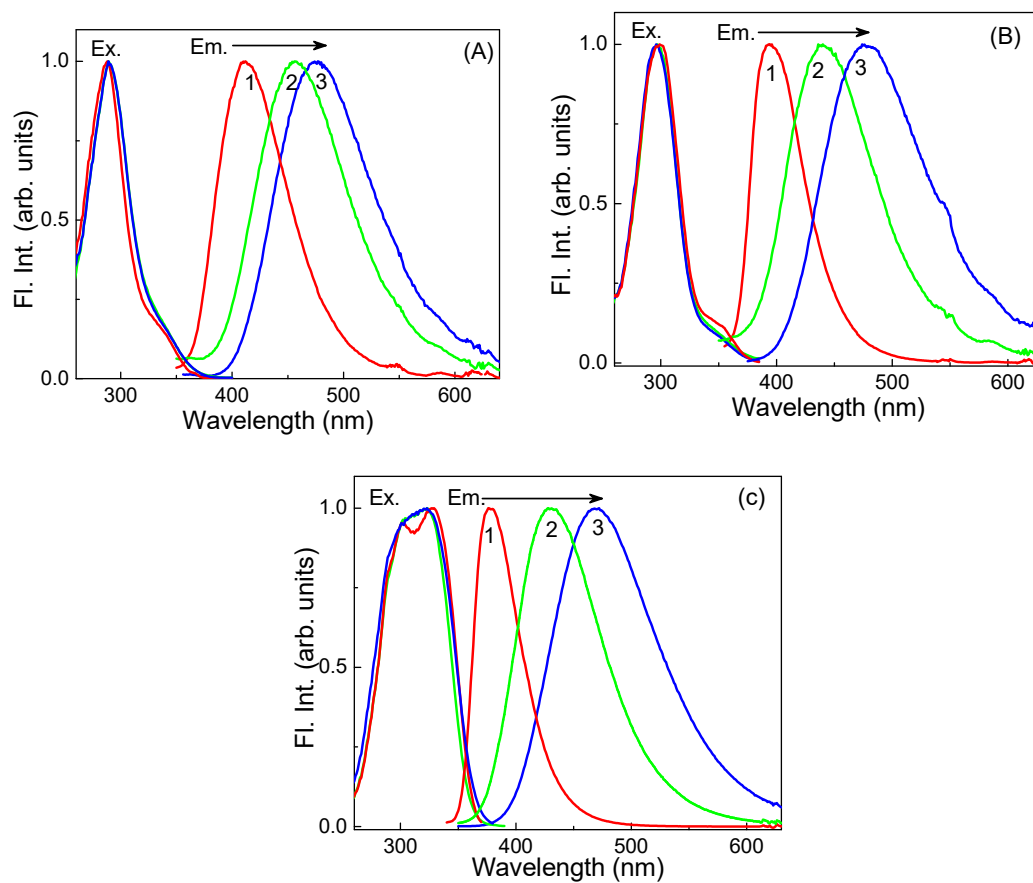

**Fig. S2.** Peak normalized emission and excitation spectra of TPA-*o* (A), TPA-*m* (B) and TPA-*p* (C) in (1) CH, (2) EA and (3) ACN solvents.

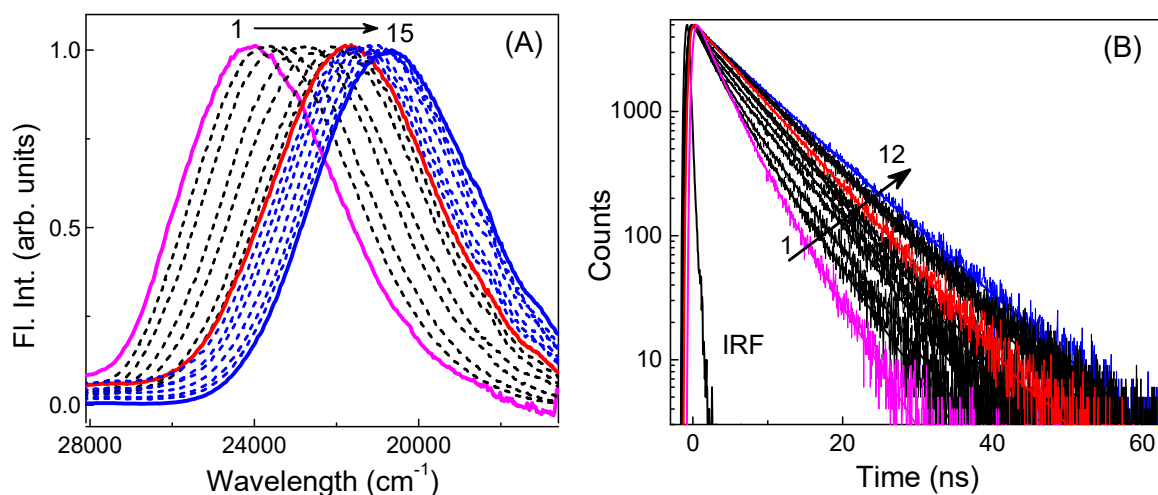

**Fig. S3.** (A) Peak normalized emission spectra of TPA-*o* in CH (magenta), CH<sub>98</sub>EA<sub>2</sub>, CH<sub>95</sub>EA<sub>5</sub>, CH<sub>85</sub>EA<sub>15</sub>, CH<sub>80</sub>EA<sub>20</sub>, CH<sub>60</sub>EA<sub>40</sub>, CH<sub>40</sub>EA<sub>60</sub>, EA (red), EA<sub>95</sub>ACN<sub>5</sub>, EA<sub>90</sub>EA<sub>10</sub>, EA<sub>80</sub>ACN<sub>20</sub>, EA<sub>60</sub>ACN<sub>40</sub>, EA<sub>40</sub>ACN<sub>60</sub>, EA<sub>20</sub>ACN<sub>80</sub>, ACN (blue) (1-15). (B) Fluorescence decay traces of TPA-*o* in CH (magenta), CH<sub>98</sub>EA<sub>2</sub>, CH<sub>95</sub>EA<sub>5</sub>, CH<sub>90</sub>EA<sub>10</sub>, CH<sub>80</sub>EA<sub>20</sub>, CH<sub>60</sub>EA<sub>40</sub>, CH<sub>20</sub>EA<sub>80</sub>, EA (red), EA<sub>60</sub>ACN<sub>40</sub>, EA<sub>40</sub>ACN<sub>20</sub>, EA<sub>20</sub>ACN<sub>80</sub>, ACN (blue) (1-12), monitored at the respective emission maxima in each solvent.

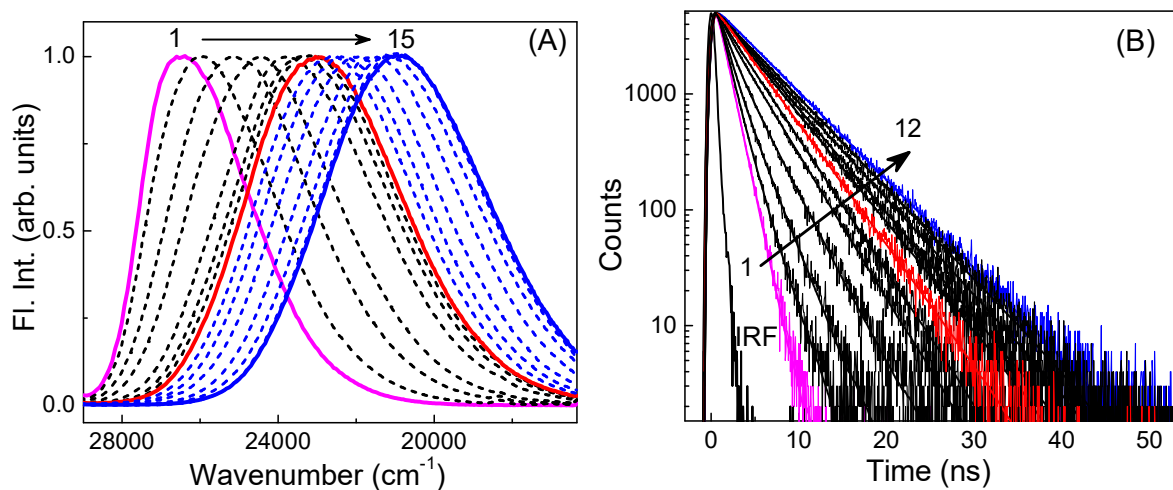

**Fig. S4.** (A) Peak normalized emission spectra of TPA-*p* in CH (magenta), CH<sub>98</sub>EA<sub>2</sub>, CH<sub>90</sub>EA<sub>10</sub>, CH<sub>80</sub>EA<sub>20</sub>, CH<sub>60</sub>EA<sub>40</sub>, CH<sub>40</sub>EA<sub>60</sub>, CH<sub>20</sub>EA<sub>80</sub>, EA (red), EA<sub>95</sub>ACN<sub>5</sub>, EA<sub>90</sub>EA<sub>10</sub>, EA<sub>80</sub>ACN<sub>20</sub>, EA<sub>60</sub>ACN<sub>40</sub>, EA<sub>40</sub>ACN<sub>60</sub>, EA<sub>10</sub>ACN<sub>90</sub>, ACN (blue) (1-15). (B) Fluorescence decay traces of TPA-*p* in CH (magenta), CH<sub>98</sub>EA<sub>2</sub>, CH<sub>90</sub>EA<sub>10</sub>, CH<sub>80</sub>EA<sub>20</sub>, CH<sub>60</sub>EA<sub>40</sub>, CH<sub>40</sub>EA<sub>60</sub>, EA (red), EA<sub>95</sub>ACN<sub>5</sub>, EA<sub>90</sub>ACN<sub>10</sub>, EA<sub>80</sub>ACN<sub>20</sub>, EA<sub>50</sub>ACN<sub>50</sub>, ACN (blue) (1-12), monitored at the respective emission maxima in each solvent.

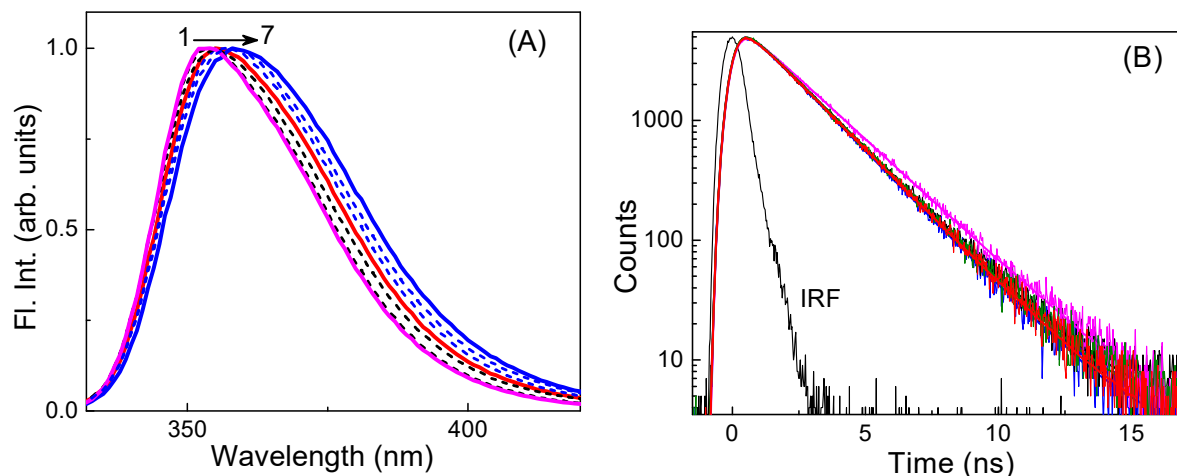

**Fig. S5.** (A) Peak normalized emission spectra of TPA in CH (magenta), CH<sub>90</sub>EA<sub>10</sub>, CH<sub>50</sub>EA<sub>50</sub>, EA (red), EA<sub>80</sub>ACN<sub>20</sub>, EA<sub>50</sub>ACN<sub>50</sub>, ACN (blue) (1-7). (B) Fluorescence decay traces of TPA in CH (magenta), CH<sub>50</sub>EA<sub>50</sub> (black), EA (red), EA<sub>50</sub>ACN<sub>50</sub> (green) and ACN (blue), monitored at the respective emission maxima in each solvent.

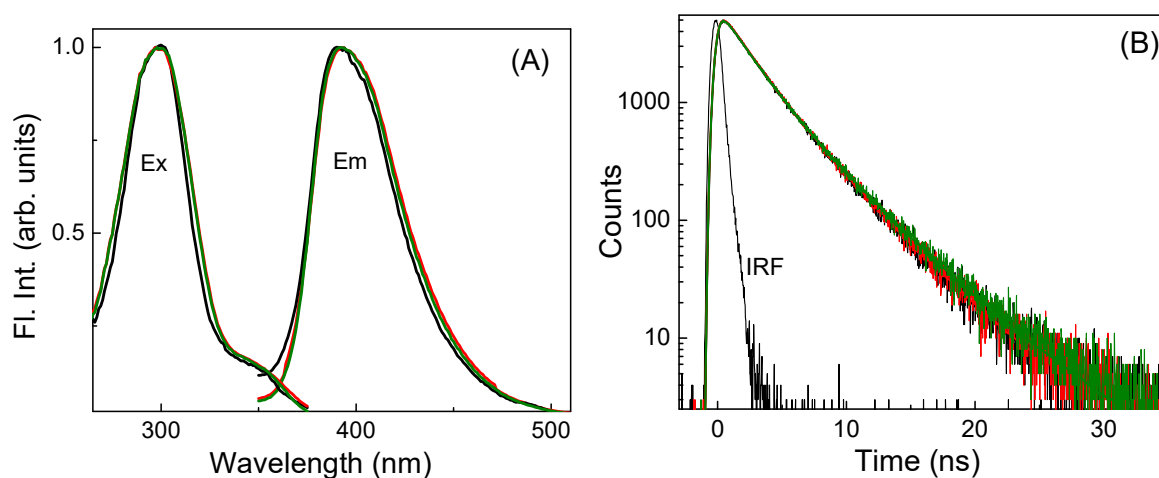

**Fig. S6.** Fluorescence emission and excitation spectra (A) and decay traces of TPA-*m* in CH at different concentrations of TPA-*m*: 3.5  $\mu$ M (black), 7.4  $\mu$ M (red) and 15.3  $\mu$ M (green).

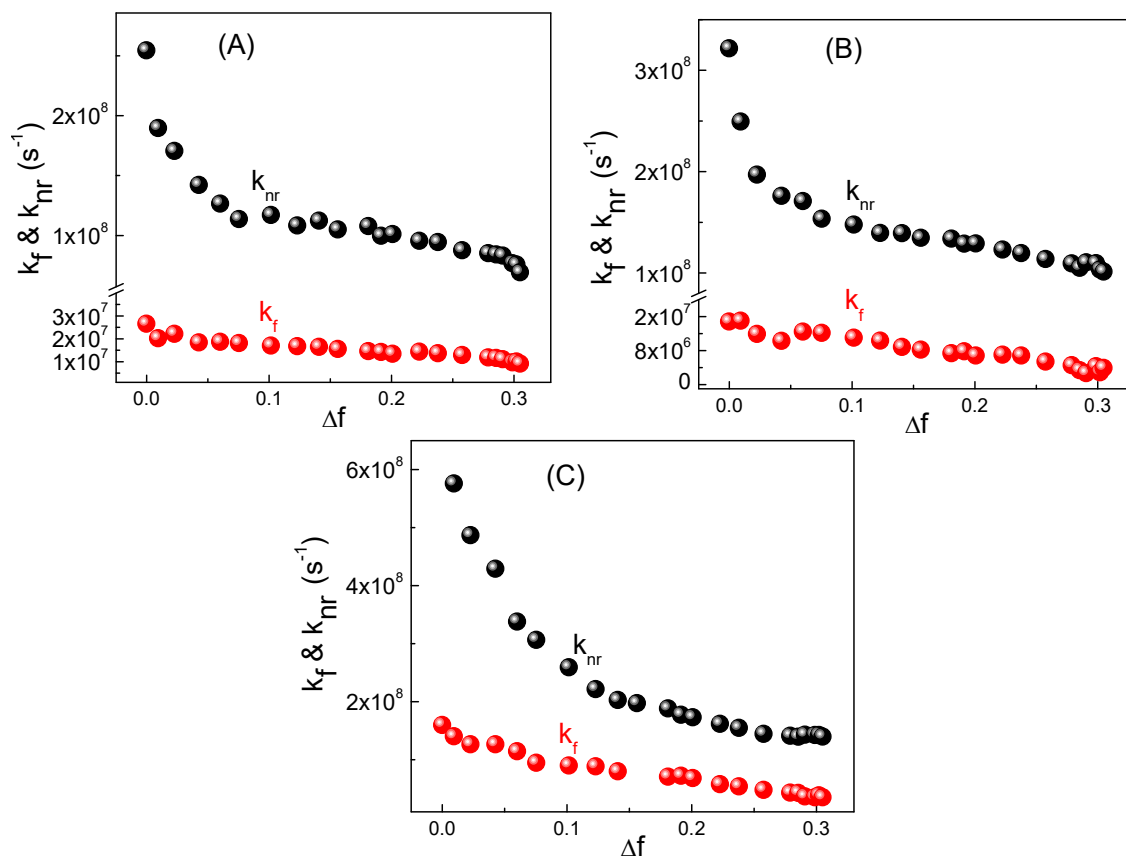

**Fig. S7** Plots of radiative ( $k_f$ , red) and nonradiative ( $k_{nr}$ , black) rates of (A) TPA-*o*, (B) TPA-*m* and (C) TPA-*p*, against the solvent polarity function ( $\Delta f$ ).

Note: The radiative ( $k_f$ ) and nonradiative ( $k_{nr}$ ) decay rate constants of the dyes were approximately obtained from the measured quantum yields and fluorescence lifetimes (average lifetimes were used for bi-exponential decays) as follows,<sup>2-5</sup>

$$k_f = \frac{\phi_f}{\tau}, \quad k_{nr} = \frac{1 - \phi_f}{\tau}$$

**Table S1.** Fluorescence decay parameters<sup>a</sup>, emission maxima ( $\bar{\nu}_{em}$ ), quantum yields ( $\phi_f$ ), radiative ( $k_f$ ) and nonradiative ( $k_{nr}$ ) decay rate constants of TPA-*p* in solvents of varying polarity parameter ( $\Delta f$ ).

| Solvent                            | $\Delta f$ | $\tau_1$<br>(ns) | $A_1$<br>(%) | $\tau_2$<br>(ns) | $A_2$<br>(%) | $\langle \tau \rangle$<br>(ns) | $\bar{\nu}_{em}$<br>( $\text{cm}^{-1}$ ) | $\phi_f$ | $k_f$<br>( $\times 10^8$ )<br>( $\text{s}^{-1}$ ) | $k_{nr}$<br>( $\times 10^8$ )<br>( $\text{s}^{-1}$ ) |
|------------------------------------|------------|------------------|--------------|------------------|--------------|--------------------------------|------------------------------------------|----------|---------------------------------------------------|------------------------------------------------------|
| CH                                 | 0          | 1.18             | 100          | -                | -            | 1.18                           | 26596                                    | 0.190    | 1.61                                              | 6.86                                                 |
| CH <sub>98</sub> EA <sub>2</sub>   | 0.009      | 1.77             | 51           | 1.00             | 49           | 1.39                           | 26178                                    | 0.196    | 1.40                                              | 5.76                                                 |
| CH <sub>95</sub> EA <sub>5</sub>   | 0.023      | 2.09             | 52           | 1.14             | 48           | 1.63                           | 25773                                    | 0.126    | 1.26                                              | 4.87                                                 |
| CH <sub>90</sub> EA <sub>10</sub>  | 0.043      | 2.27             | 60           | 1.1              | 40           | 1.80                           | 25381                                    | 0.227    | 1.26                                              | 4.29                                                 |
| CH <sub>85</sub> EA <sub>15</sub>  | 0.060      | 2.69             | 68           | 1.19             | 32           | 2.21                           | 25000                                    | 0.253    | 1.14                                              | 3.38                                                 |
| CH <sub>80</sub> EA <sub>20</sub>  | 0.075      | 2.91             | 76           | 1.16             | 24           | 2.49                           | 24691                                    | 0.236    | 0.95                                              | 3.07                                                 |
| CH <sub>60</sub> EA <sub>40</sub>  | 0.123      | 3.46             | 91           | 0.81             | 9            | 3.22                           | 24038                                    | 0.286    | 0.89                                              | 2.22                                                 |
| CH <sub>50</sub> EA <sub>50</sub>  | 0.141      | 3.73             | 93           | 0.95             | 7            | 3.54                           | 23810                                    | 0.283    | 0.80                                              | 2.03                                                 |
| CH <sub>40</sub> EA <sub>60</sub>  | 0.156      | 3.78             | 95           | 0.59             | 5            | 3.62                           | 23753                                    | 0.285    | 0.79                                              | 1.97                                                 |
| CH <sub>20</sub> EA <sub>80</sub>  | 0.181      | 3.86             | 100          | -                | -            | 3.86                           | 23419                                    | 0.273    | 0.70                                              | 1.88                                                 |
| CH <sub>10</sub> EA <sub>90</sub>  | 0.191      | 4.01             | 100          | -                | -            | 4.01                           | 23419                                    | 0.288    | 0.72                                              | 1.78                                                 |
| EA                                 | 0.201      | 4.14             | 100          | -                | -            | 4.14                           | 23255                                    | 0.282    | 0.68                                              | 1.73                                                 |
| EA <sub>95</sub> ACN <sub>5</sub>  | 0.223      | 4.56             | 100          | -                | -            | 4.56                           | 22950                                    | 0.262    | 0.57                                              | 1.62                                                 |
| EA <sub>90</sub> ACN <sub>10</sub> | 0.238      | 4.78             | 100          | -                | -            | 4.78                           | 22624                                    | 0.260    | 0.54                                              | 1.55                                                 |
| EA <sub>80</sub> ACN <sub>20</sub> | 0.258      | 5.18             | 100          | -                | -            | 5.18                           | 22271                                    | 0.250    | 0.48                                              | 1.45                                                 |
| EA <sub>60</sub> ACN <sub>40</sub> | 0.279      | 5.42             | 100          | -                | -            | 5.42                           | 21881                                    | 0.233    | 0.43                                              | 1.41                                                 |
| EA <sub>50</sub> ACN <sub>50</sub> | 0.286      | 5.49             | 100          | -                | -            | 5.49                           | 21500                                    | 0.234    | 0.43                                              | 1.40                                                 |
| EA <sub>40</sub> ACN <sub>60</sub> | 0.291      | 5.57             | 100          | -                | -            | 5.57                           | 21382                                    | 0.203    | 0.36                                              | 1.43                                                 |
| EA <sub>20</sub> ACN <sub>80</sub> | 0.299      | 5.63             | 100          | -                | -            | 5.63                           | 21277                                    | 0.198    | 0.35                                              | 1.43                                                 |
| EA <sub>10</sub> ACN <sub>90</sub> | 0.302      | 5.53             | 100          | -                | -            | 5.53                           | 21277                                    | 0.212    | 0.38                                              | 1.42                                                 |
| ACN                                | 0.305      | 5.60             | 100          | -                | -            | 5.60                           | 21278                                    | 0.200    | 0.35                                              | 1.41                                                 |

<sup>a</sup>The fluorescence decays are fitted by considering either single or bi-exponential functions with general expression as,  $I(t) = \sum_i a_i \exp(-t/\tau_i)$ . The relative contribution of each decay

component  $\tau_i$ , is calculated as,  $A_i(\%) = \frac{a_i \tau_i}{\sum_i a_i \tau_i} \times 100$  and the average lifetime,  $\langle \tau \rangle$  is

calculated as,  $\langle \tau \rangle = \sum_i A_i \tau_i / 100$ .



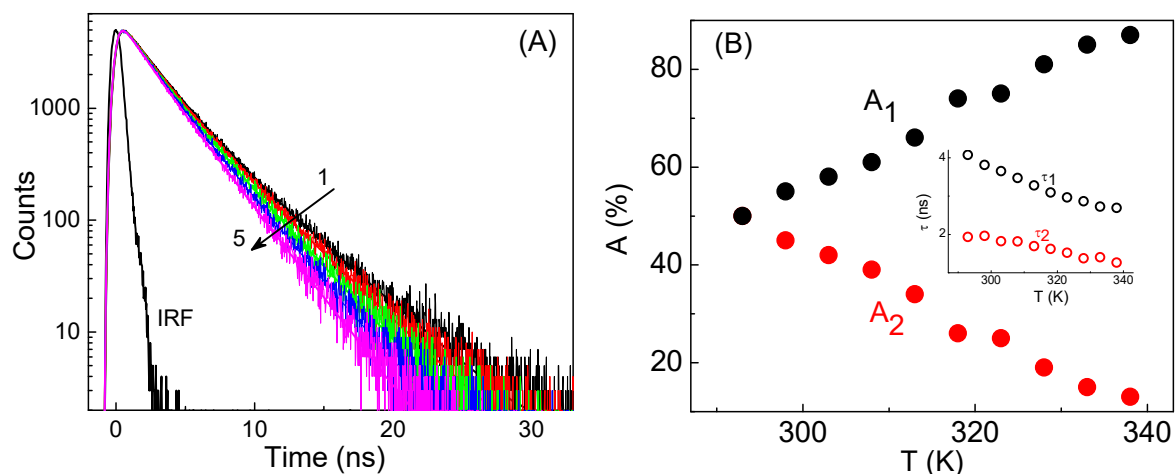

**Fig. S8.** (A) Fluorescence decay traces of TPA-*m* in CH at 20°C, 30°C, 40°C, 50°C, 65°C (1-5). (B) Plots of the relative contributions ( $A_1$  and  $A_2$ ) of the two decay components ( $\tau_1$  and  $\tau_2$ ) of TPA-*m* in CH against temperature. The variations in the magnitudes of  $\tau_1$  and  $\tau_2$  with temperature are shown in the inset.

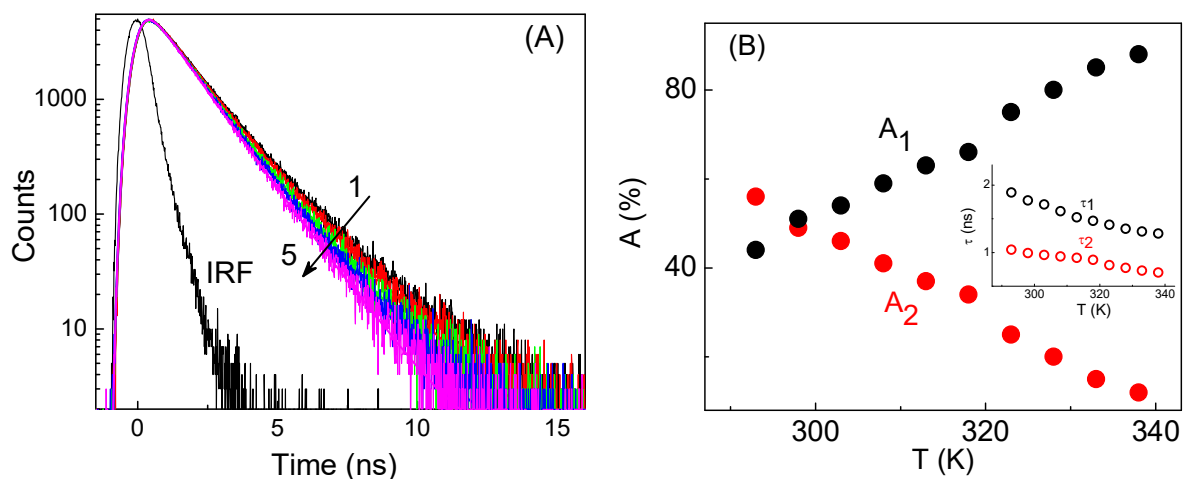

**Fig. S9.** (A) Fluorescence decay traces of TPA-*p* in  $\text{CH}_{98}\text{EA}_2$  solvent mixture at 20°C, 30°C, 40°C, 50°C, 65°C (1-5). (B) Plots of the relative contributions ( $A_1$  and  $A_2$ ) of the two decay components ( $\tau_1$  and  $\tau_2$ ) of TPA-*p* in  $\text{CH}_{98}\text{EA}_2$  solvent mixture against temperature. The variations in the magnitudes of  $\tau_1$  and  $\tau_2$  with temperature are shown in the inset.

(A)

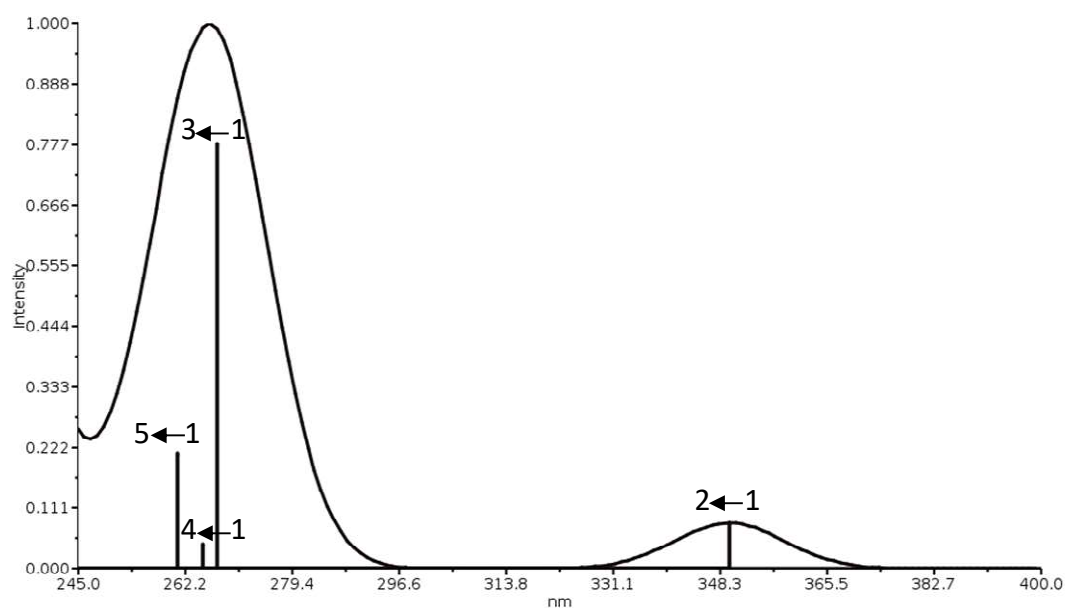

(B)

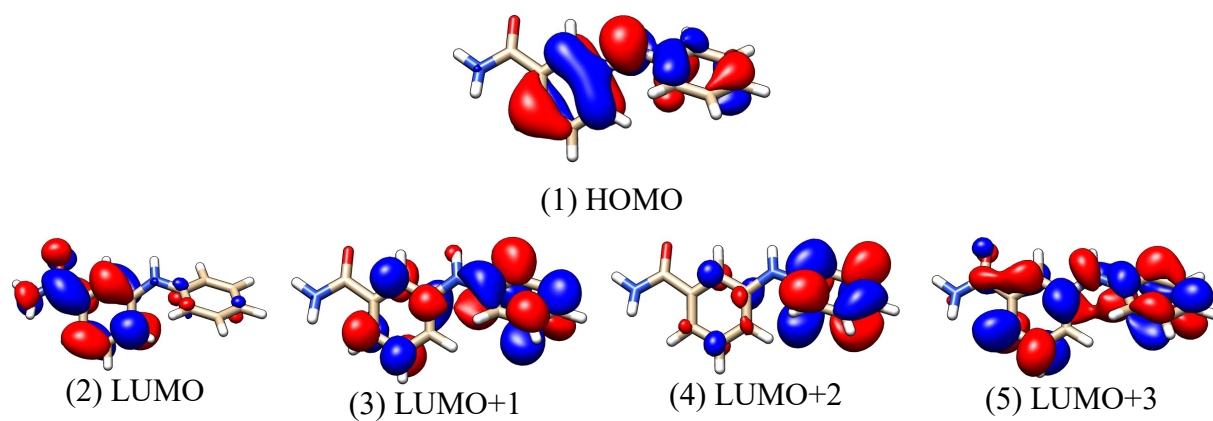

**Fig. S10.** (A) Computed absorption spectrum of DPA-*m* dye considering ACN as the solvent medium. (B) Molecular orbitals involved in the four lowest transitions are shown.

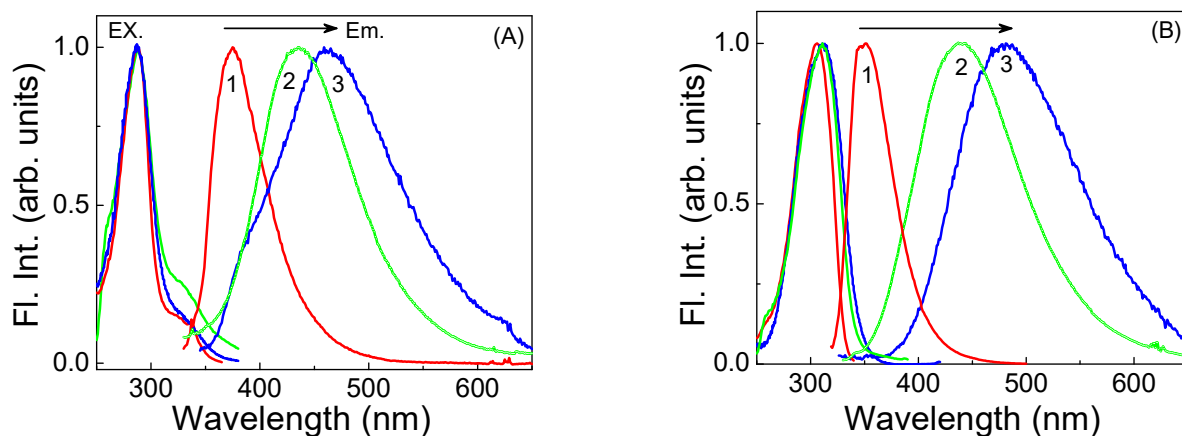

**Fig. S11.** Peak normalized emission and excitation spectra of DPA-*m* (A) and DPA-*p* (B) in (1) CH, (2) EA and (3) ACN.

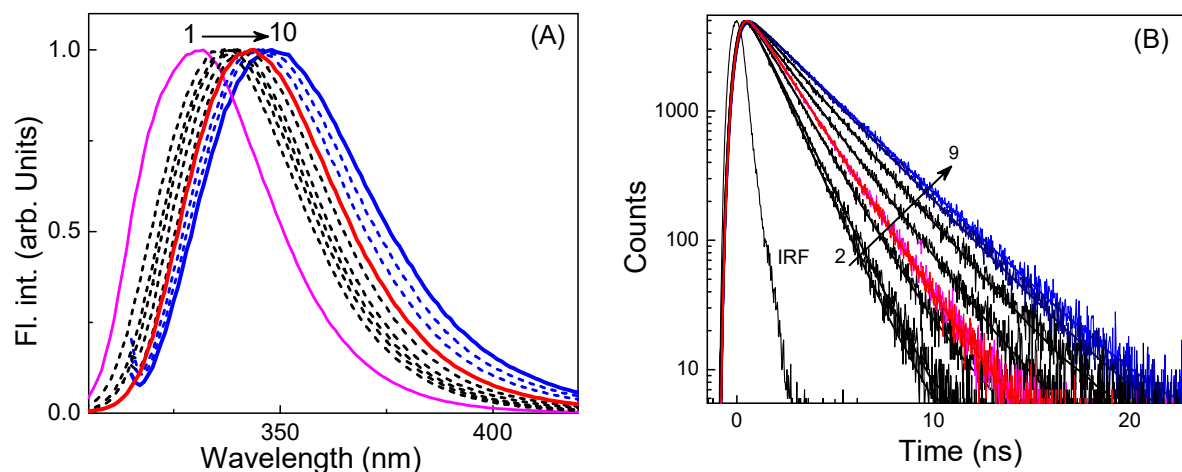

**Fig. S12.** (A) Peak normalized emission spectra of DPA in CH (magenta), CH<sub>98</sub>EA<sub>2</sub>, CH<sub>95</sub>EA<sub>5</sub>, CH<sub>90</sub>EA<sub>10</sub>, CH<sub>80</sub>EA<sub>20</sub>, CH<sub>50</sub>EA<sub>50</sub>, EA (red), EA<sub>80</sub>ACN<sub>20</sub>, EA<sub>50</sub>ACN<sub>50</sub>, ACN (blue) (1-10). (B) Fluorescence decay traces of DPA in CH (1, magenta), CH<sub>90</sub>EA<sub>10</sub>, CH<sub>80</sub>EA<sub>20</sub>, CH<sub>50</sub>EA<sub>50</sub>, EA (red), EA<sub>80</sub>ACN<sub>20</sub>, EA<sub>50</sub>ACN<sub>50</sub>, EA<sub>20</sub>ACN<sub>80</sub>, ACN (blue) (2-9), monitored at the respective emission maxima in each solvent. IRF is the instrument response function.

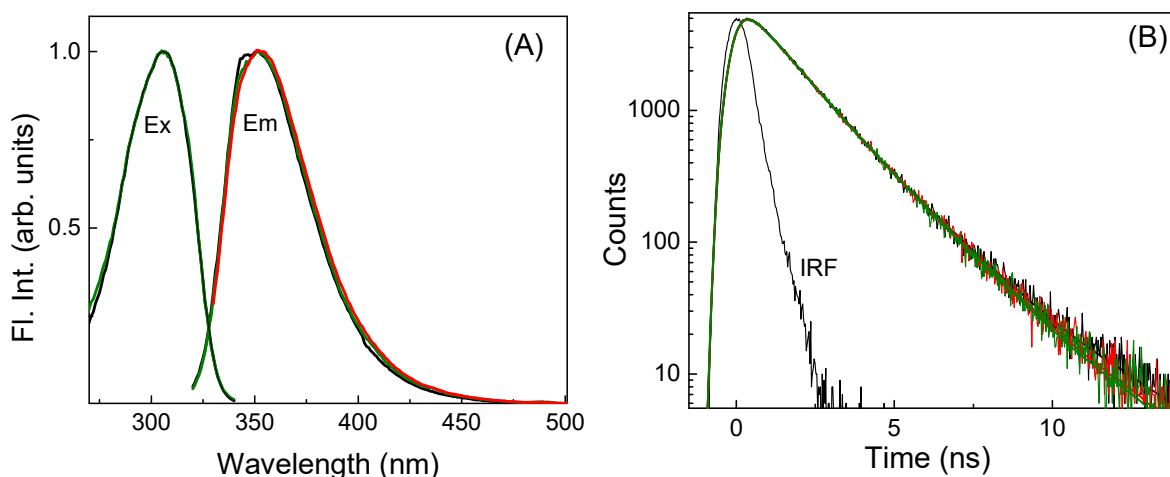

**Fig. S13.** Fluorescence emission and excitation spectra (A) and decay traces of DPA-*p* in CH at different concentrations of DPA-*p*: 3.8  $\mu\text{M}$  (black), 8.8  $\mu\text{M}$  (red) and 16.5  $\mu\text{M}$  (green).

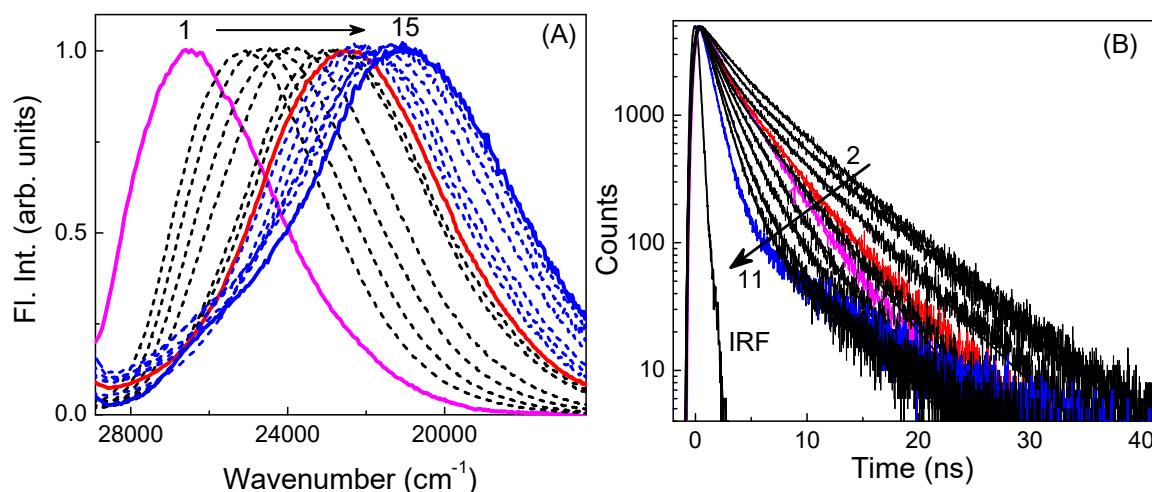

**Fig. S14.** (A) Peak normalized emission spectra of DPA-*m* in CH (magenta),  $\text{CH}_{98}\text{EA}_2$ ,  $\text{CH}_{95}\text{EA}_5$ ,  $\text{CH}_{90}\text{EA}_{10}$ ,  $\text{CH}_{80}\text{EA}_{20}$ ,  $\text{CH}_{60}\text{EA}_{40}$ ,  $\text{CH}_{50}\text{EA}_{50}$ , EA (red),  $\text{EA}_{95}\text{ACN}_5$ ,  $\text{EA}_{90}\text{EA}_{10}$ ,  $\text{EA}_{80}\text{ACN}_{20}$ ,  $\text{EA}_{50}\text{ACN}_{50}$ ,  $\text{EA}_{40}\text{ACN}_{60}$ ,  $\text{EA}_{20}\text{ACN}_{80}$ , ACN (blue) (1-15). (B) Fluorescence decay traces of DPA-*m* in CH (1, magenta),  $\text{CH}_{99}\text{EA}_1$ ,  $\text{CH}_{80}\text{EA}_{20}$ ,  $\text{CH}_{70}\text{EA}_{30}$ ,  $\text{CH}_{40}\text{EA}_{60}$ , EA (red),  $\text{EA}_{90}\text{ACN}_{10}$ ,  $\text{EA}_{80}\text{ACN}_{20}$ ,  $\text{EA}_{60}\text{ACN}_{40}$ ,  $\text{EA}_{40}\text{ACN}_{60}$ , ACN (blue) (2-11), monitored at the respective emission maxima in each solvent. IRF is the instrument response function.

**Table S2.** Fluorescence decay parameters<sup>a</sup>, emission maxima ( $\bar{\nu}_{em}$ ), quantum yields ( $\phi_f$ ), radiative ( $k_f$ ) and nonradiative ( $k_{nr}$ ) decay rate constants of DPA-*m* in solvents of varying polarity parameter ( $\Delta f$ ).

| Solvent                            | $\Delta f$ | $\tau_1$<br>(ns) | $A_1$<br>(%) | $\tau_2$<br>(ns) | $A_2$<br>(%) | $\langle \tau \rangle$<br>(ns) | $\bar{\nu}_{em}$<br>( $\text{cm}^{-1}$ ) | $\phi_f$ | $k_f$<br>( $\times 10^8$ )<br>( $\text{s}^{-1}$ ) | $k_{nr}$<br>( $\times 10^8$ )<br>( $\text{s}^{-1}$ ) |
|------------------------------------|------------|------------------|--------------|------------------|--------------|--------------------------------|------------------------------------------|----------|---------------------------------------------------|------------------------------------------------------|
| CH                                 | 0          | 3.67             | 51           | 1.96             | 49           | 2.83                           | 26667                                    | 0.037    | 0.13                                              | 3.40                                                 |
| CH <sub>98</sub> EA <sub>2</sub>   | 0.009      | 6.00             | 59           | 3.02             | 41           | 4.78                           | 25510                                    | 0.107    | 0.22                                              | 1.87                                                 |
| CH <sub>95</sub> EA <sub>5</sub>   | 0.023      | 6.03             | 78           | 2.82             | 22           | 5.33                           | 24938                                    | 0.096    | 0.18                                              | 1.70                                                 |
| CH <sub>90</sub> EA <sub>10</sub>  | 0.043      | 6.25             | 68           | 2.97             | 32           | 5.20                           | 24450                                    | 0.077    | 0.15                                              | 1.77                                                 |
| CH <sub>85</sub> EA <sub>15</sub>  | 0.060      | 6.09             | 63           | 2.45             | 37           | 4.74                           | 24331                                    | 0.071    | 0.15                                              | 1.96                                                 |
| CH <sub>80</sub> EA <sub>20</sub>  | 0.075      | 6.09             | 66           | 2.08             | 34           | 4.72                           | 24155                                    | 0.065    | 0.14                                              | 1.98                                                 |
| CH <sub>60</sub> EA <sub>40</sub>  | 0.123      | 4.83             | 70           | 1.23             | 30           | 3.76                           | 23474                                    | 0.035    | 0.11                                              | 2.96                                                 |
| CH <sub>50</sub> EA <sub>50</sub>  | 0.141      | 3.89             | 74           | 1.46             | 26           | 3.25                           | 23419                                    | 0.032    | 0.10                                              | 2.98                                                 |
| CH <sub>40</sub> EA <sub>60</sub>  | 0.156      | 3.87             | 74           | 1.16             | 26           | 3.17                           | 23202                                    | 0.032    | 0.10                                              | 3.06                                                 |
| CH <sub>20</sub> EA <sub>80</sub>  | 0.181      | 4.08             | 74           | 1.29             | 26           | 3.35                           | 23041                                    | 0.032    | 0.09                                              | 2.89                                                 |
| CH <sub>10</sub> EA <sub>90</sub>  | 0.191      | 4.10             | 78           | 1.19             | 22           | 3.46                           | 23095                                    | 0.032    | 0.09                                              | 2.80                                                 |
| EA                                 | 0.201      | 3.84             | 74           | 1.26             | 26           | 3.17                           | 22936                                    | 0.036    | 0.09                                              | 3.06                                                 |
| EA <sub>95</sub> ACN <sub>5</sub>  | 0.223      | 3.59             | 67           | 1.42             | 33           | 2.87                           | 22624                                    | 0.028    | 0.08                                              | 3.40                                                 |
| EA <sub>90</sub> ACN <sub>10</sub> | 0.238      | 3.33             | 61           | 1.40             | 39           | 2.58                           | 22472                                    | 0.020    | 0.08                                              | 3.80                                                 |
| EA <sub>80</sub> ACN <sub>20</sub> | 0.258      | 3.59             | 35           | 1.54             | 65           | 2.26                           | 22422                                    | 0.016    | 0.07                                              | 4.36                                                 |
| EA <sub>60</sub> ACN <sub>40</sub> | 0.279      | 4.69             | 15           | 1.46             | 85           | 1.94                           | 22222                                    | 0.011    | 0.06                                              | 5.07                                                 |
| EA <sub>50</sub> ACN <sub>50</sub> | 0.286      | 5.20             | 13           | 1.33             | 87           | 1.83                           | 22124                                    | 0.013    | 0.06                                              | 5.39                                                 |
| EA <sub>40</sub> ACN <sub>60</sub> | 0.291      | 5.48             | 11           | 1.25             | 89           | 1.72                           | 22026                                    | 0.007    | 0.04                                              | 5.77                                                 |
| EA <sub>20</sub> ACN <sub>80</sub> | 0.299      | 6.12             | 11           | 1.08             | 89           | 1.63                           | 21739                                    | 0.008    | 0.05                                              | 6.05                                                 |
| EA <sub>10</sub> ACN <sub>90</sub> | 0.302      | 6.24             | 11           | 1.01             | 89           | 1.59                           | 21692                                    | 0.006    | 0.04                                              | 6.27                                                 |
| ACN                                | 0.305      | 6.45             | 13           | 0.94             | 86           | 1.62                           | 21645                                    | 0.006    | 0.04                                              | 6.17                                                 |

<sup>a</sup>The fluorescence decays are fitted by considering either single or bi-exponential functions with general expression as,  $I(t) = \sum_i a_i \exp(-t/\tau_i)$ . The relative contribution of each decay

component  $\tau_i$ , is calculated as,  $A_i(\%) = \frac{a_i \tau_i}{\sum_i a_i \tau_i} \times 100$  and the average lifetime,  $\langle \tau \rangle$  is

calculated as,  $\langle \tau \rangle = \sum_i A_i \tau_i / 100$ .

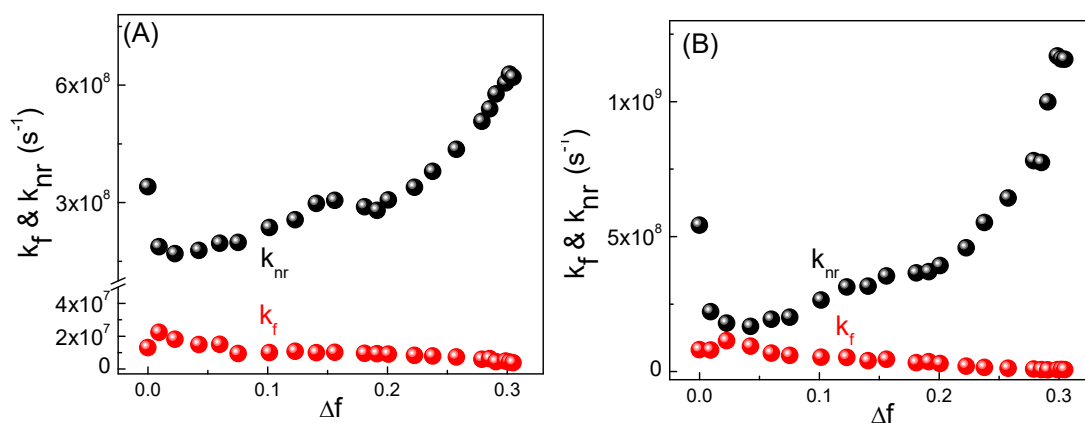

**Fig. S15.** Plots of radiative ( $k_f$ ) and nonradiative ( $k_{nr}$ ) decay rates of (A) DPA-*m* and (B) DPA-*p*, against the solvent polarity function ( $\Delta f$ ).

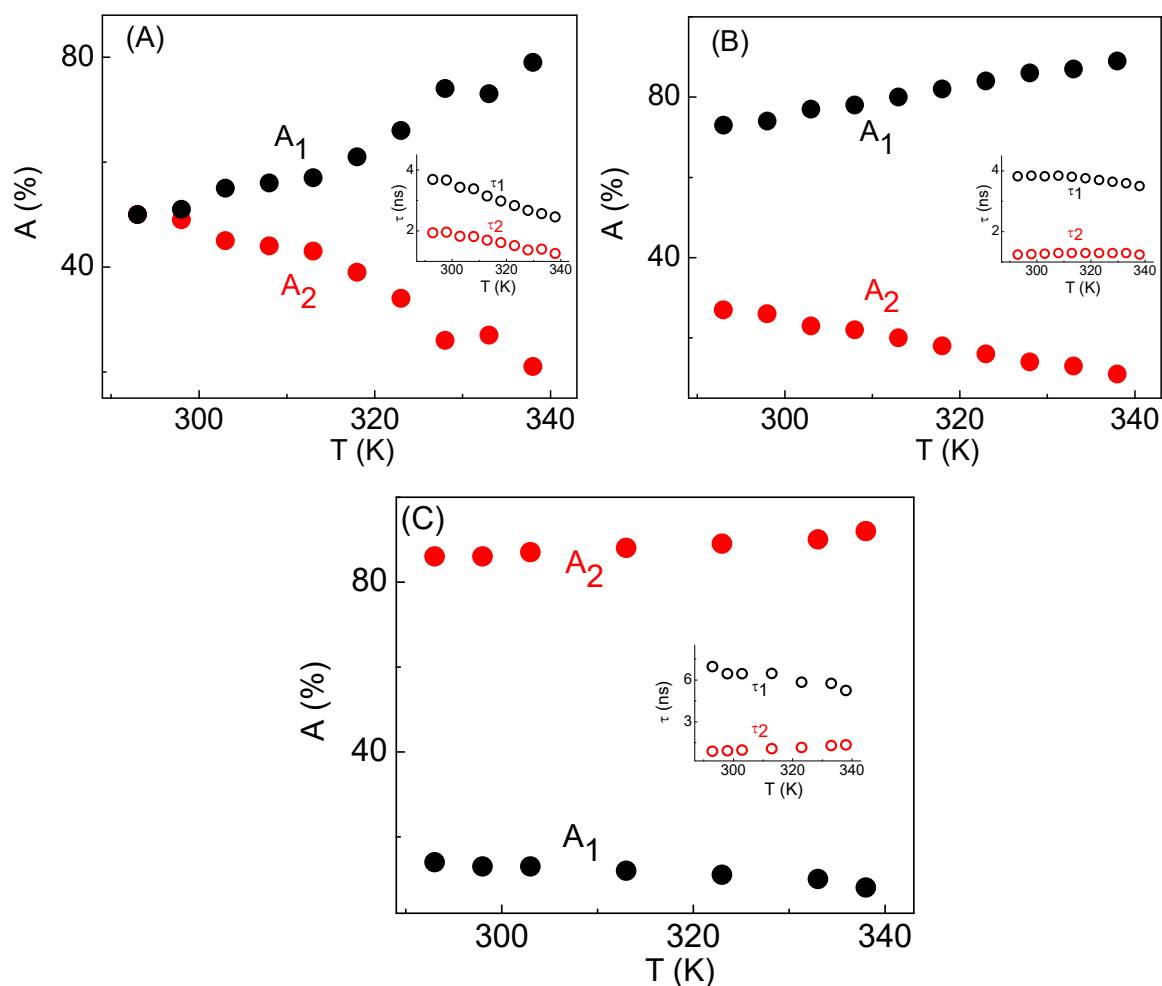

**Fig. S16.** Plots of the relative contributions ( $A_1$  and  $A_2$ ) of the two decay components ( $\tau_1$  and  $\tau_2$ ) of DPA-*m* against temperature in (A) CH, (B) EA and (C) ACN. The variations in the magnitudes of  $\tau_1$  and  $\tau_2$  with temperature are shown in the insets.

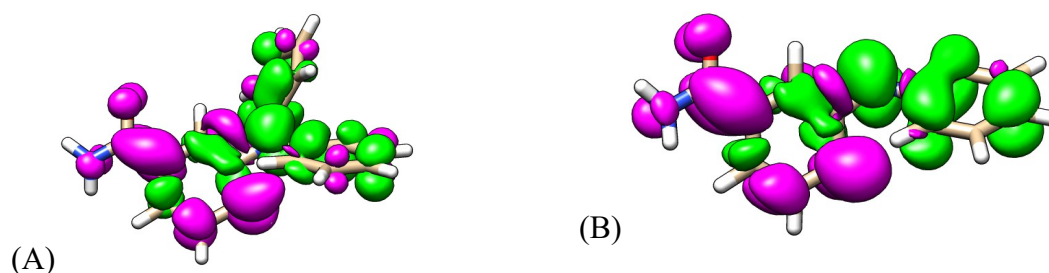

**Fig. S17.** Difference density plots of the first excited state depicting the HOMO to LUMO transition of (A) TPA-*m* and (B) DPA-*m* in ACN solvent. Green and purple indicate the electron donor and acceptor orbitals.

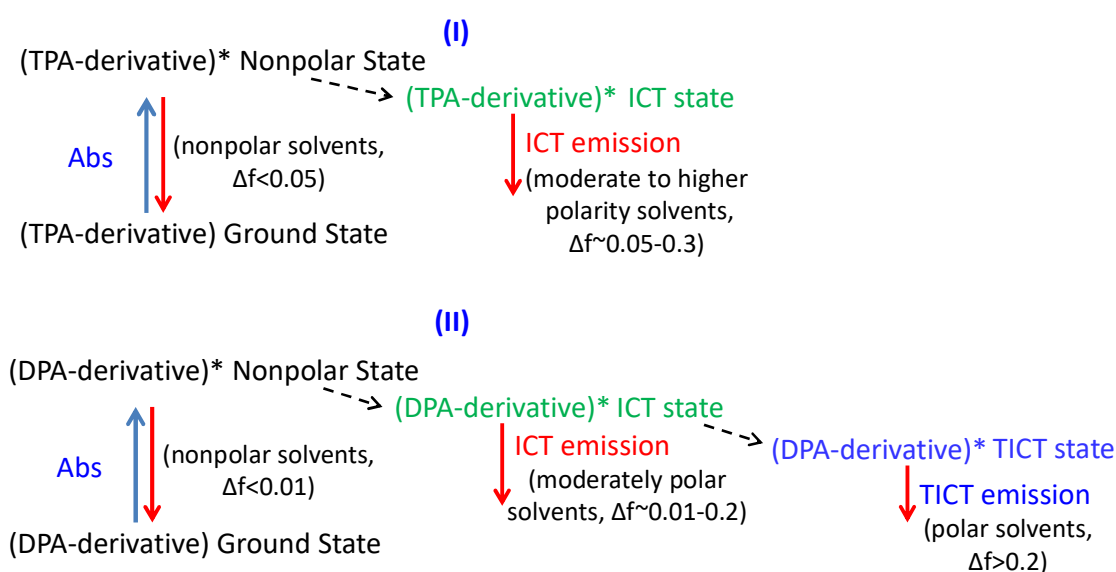

**Fig. S18.** Schematic representation of the emissive states of (I) TPA and (II) DPA series of dyes in solvents of varying polarities.

## References

- 1 R.S. Meerakrishna and P. Shanmugam, *New J. Chem.* 2019, **43**, 2550-2558.
- 2 J. R. Lakowicz, *Principles of Fluorescence Spectroscopy*, Springer, New York, 2006.
- 3 S. Nad and H. Pal, *J. Phys. Chem. A*, 2001, **105**, 1097-1106.
- 4 J. Cabrera-González, C. Viñas, M. Haukka, S. Bhattacharyya, J. Gierschner and R. Núñez, *Chem. Eur. J.*, 2016, **22**, 13588-13598.
- 5 A. K. Singh, S. Das, A. Karmakar, A. Kumar and A. Datta, *Phys. Chem. Chem. Phys.*, 2018, **20**, 22320-22330.
